# Supplementary material for: Combined cellular and soluble mediator analysis for improved diagnosis of vitreoretinal lymphoma
Source: PubMed Central journal article supplement — Acta Ophthalmol. 2019 Jan 27;97(6):626–32. doi: 10.1111/aos.14036 (PMC6796208; doi:10.1111/aos.14036), 2019-01-27
Supplement: AOS-97-626-s001.pdf [file AOS-97-626-s001.pdf]

| Supplementary Table 1 Cellular parameters |        |     |                                 |         |          |          |          |         |           |         |          |          |         |           |             |       |
|-------------------------------------------|--------|-----|---------------------------------|---------|----------|----------|----------|---------|-----------|---------|----------|----------|---------|-----------|-------------|-------|
| Patient Info                              |        |     | (Working) diagnosis             | T-cells |          |          |          |         | monocytes | B-cells |          |          |         | NK-cells  | neutrophils | other |
|                                           | Gender | Age |                                 | CD3     | CD3+CD4+ | CD3+CD8+ | CD4+CD8+ | CD4/CD8 | CD14      | CD19    | CD19/IgK | CD19/IgL | SmlgK/L | CD56+CD3- |             |       |
|                                           |        |     |                                 | %       | %        | %        | %        | ratio   | %         | %       | %        | %        | ratio   | %         | %           | %     |
| 1                                         | M      | 74  | Acute retina necrosis           | 100     | 50       | 50       | 0,1      | 1       | 0,1       | 0,1     | 50       | 50       | 1,0     | 0,1       | 0,1         | 0,1   |
| 2                                         | M      | 19  | Acute retina necrosis           | 62      | 66       | 18       | 10       | 3,7     | 21        | 17      | 41       | 59       | 0,7     | 0,1       | 0,1         | 0,1   |
| 3                                         | M      | 40  | Acute retina necrosis           | n.a.    | n.a.     | n.a.     | n.a.     | n.a.    | n.a.      | n.a.    | n.a.     | n.a.     | n.a.    | n.a.      | n.a.        | n.a.  |
| 4                                         | F      | 78  | Colitis ulcerosa                | 0,1     | 50       | 50       | 0,1      | 1       | 21        | 0,1     | 50       | 50       | 1,0     | 6         | 15          | 59    |
| 5                                         | F      | 61  | E.c.i.                          | 63      | 96       | 4        | 0,1      | 10      | 29        | 0,1     | 50       | 50       | 1,0     | 8         | 0,1         | 0,1   |
| 6                                         | F      | 45  | E.c.i.                          | 62      | 79       | 16       | 4        | 4,9     | 33        | 3       | 25       | 75       | 0,3     | 2         | 0,1         | 0,1   |
| 7                                         | F      | 48  | E.c.i. Pars planinitis          | 48      | 79       | 18       | 0,1      | 4,4     | 0,1       | 0,1     | 50       | 50       | 1,0     | 0,1       | 0,1         | 0,1   |
| 8                                         | M      | 62  | E.c.i. Pars planinitis          | 23      | 80       | 20       | 0,1      | 4,0     | 77        | 0,1     | 50       | 50       | 1,0     | 0,1       | 0,1         | 0,1   |
| 9                                         | F      | 74  | E.c.i. Uveitis posterior        | 57      | 57       | 24       | 10       | 2,4     | 1         | 10      | n.a.     | n.a.     | n.a.    | 31        | 1           | 0,1   |
| 10                                        | F      | 56  | E.c.i. Uveitis posterior e.c.i. | 59      | 55       | 36       | 1        | 1,5     | 4         | 0,1     | 50       | 50       | 1,0     | 4         | 32          | 0,1   |
| 11                                        | F      | 80  | E.c.i. Vitritis                 | 35      | 40       | 60       | 0,1      | 0,7     | 0,1       | 2       | 50       | 50       | 1       | 7         | 53          | 0,1   |
| 12                                        | F      | 79  | E.c.i. Vitritis                 | 85      | 58       | 42       | 0,1      | 1,4     | 5         | 1       | 20       | 80       | 0,25    | 6         | 3           | 0,1   |
| 13                                        | M      | 63  | E.c.i. Vitritis ODS             | 79      | 53       | 36       | 9        | 1,5     | 5         | 2       | 33       | 66       | 0,5     | 3         | 10          | 0,1   |
| 14                                        | F      | 69  | E.c.i. Vitritis/floaters        | 18      | 52       | 32       | 11       | 1,6     | 16        | 1       | 50       | 50       | 1       | 0,1       | 65          | 0,1   |
| 15                                        | M      | 33  | Endogenous endophthalmitis      | 46      | 80       | 15       | 3        | 5       | 22        | 0,1     | 50       | 50       | 1,0     | 1         | 31          | 0,1   |
| 16                                        | F      | 71  | no uveitis                      | 56      | 8        | 57       | 27       | 0,1     | 3         | 0,1     | 50       | 50       | 1,0     | 3         | 38          | 0,1   |
| 17                                        | F      | 68  | no uveitis                      | 93      | 72       | 25       | 2        | 3       | 2         | 1       | 50       | 50       | 1,0     | 1         | 3           | 0,1   |
| 18                                        | F      | 55  | no uveitis (RRD)                | 33      | 50       | 50       | 0,1      | 1       | 67        | 0,1     | 50       | 50       | 1,0     | 0,1       | 0,1         | 0,1   |
| 19                                        | M      | 58  | Lymphoma                        | 1       | 50       | 50       | 0,1      | 1       | 0,1       | 43      | 0,1      | 100      | <0,1    | 0,1       | 54          | 0,1   |
| 20                                        | F      | 67  | Lymphoma                        | 0,1     | 50       | 50       | 0,1      | 1       | 23        | 33      | 100      | 0,1      | >10     | 0,1       | 43          | 0,1   |
| 21                                        | M      | 45  | Lymphoma                        | 5       | 58       | 5        | 37       | 10      | 2         | 89      | 98       | 2        | >10     | 1         | 3           | 0,1   |
| 22                                        | M      | 57  | Lymphoma                        | 99      | 100      | 0,1      | 0,1      | 10      | 0,1       | 0,1     | 50       | 50       | 1,0     | 0,1       | 0,1         | 0,1   |
| 23                                        | F      | 85  | Lymphoma                        | 53      | 71       | 28       | 0,1      | 2,6     | 41        | 0,1     | 0,1      | 100      | <0,1    | 4         | 0,1         | 0,1   |
| 24                                        | M      | 71  | Lymphoma                        | 77      | 69       | 29       | 0,1      | 2,4     | 4         | 2       | 0,1      | 100      | <0,1    | 16        | 0,1         | 0,1   |
| 25                                        | F      | 83  | Lymphoma                        | 89      | 70       | 16       | 0,1      | 4,6     | 8         | 3       | n.a.     | n.a.     | n.a.    | 0,1       | 0,1         | 0,1   |
| 26                                        | M      | 27  | Lymphoma                        | 13      | 14       | 57       | 0,1      | 0,25    | 4         | 83      | 100      | 0,1      | >10     | 0,1       | 0,1         | 0,1   |
| 27                                        | F      | 75  | Lymphoma                        | 6       | 42       | 55       | 0,1      | 0,8     | 5         | 78      | 100      | 0,1      | >10     | 9         | 0,1         | 2     |
| 28                                        | M      | 58  | Lymphoma                        | 35      | 45       | 20       | 17       | 2       | 11        | 41      | n.a.     | n.a.     | n.a.    | 3         | 11          | 0,1   |
| 29                                        | M      | 45  | MS-related uveitis              | 61      | 59       | 39       | 0,1      | 1,5     | 0,1       | 28      | 0,1      | 100      | <0,1    | 11        | 0,1         | 0,1   |
| 30                                        | F      | 47  | MS-related uveitis              | 37      | 75       | 25       | 0,1      | 3       | 47        | 9       | 0,1      | 100      | >10     | 6         | 0,1         | 0,1   |
| 31                                        | M      | 43  | Rubella (FUCHS)                 | 91      | 50       | 49       | 0,1      | 1       | 3         | 0,1     | 50       | 50       | 1       | 2         | 0,1         | 0,1   |
| 32                                        | F      | 78  | Sarcoidosis                     | 94      | 82       | 4        | 13       | 10      | 5         | 0,1     | 50       | 50       | 1       | 0,1       | 2           | 0,1   |
| 33                                        | F      | 66  | Sarcoidosis                     | 15      | 56       | 28       | 16       | 2       | 3         | 0,1     | 50       | 50       | 1       | 48        | 33          | 0,1   |
| 34                                        | M      | 70  | Sarcoidosis                     | 81      | 87       | 4        | 7        | 10      | 11        | 0,1     | 50       | 50       | 1       | 3         | 5           | 0,1   |
| 35                                        | F      | 53  | Sarcoidosis                     | 24      | 33       | 0,1      | 67       | 10      | 22        | 6       | 33       | 67       | 0,5     | 2         | 0,1         | 0,1   |
| 36                                        | F      | 50  | Sarcoidosis                     | 10      | 50       | 0,1      | 50       | 10      | 52        | 38      | 12       | 88       | 0,14    | 0,1       | 0,1         | 0,1   |
| 37                                        | F      | 43  | Sarcoidosis                     | 40      | 88       | 10       | 0,1      | 9,1     | 57        | 0,1     | 50       | 50       | 1       | 0,1       | 0,1         | 0,1   |
| 38                                        | F      | 74  | Sarcoidosis                     | 67      | 67       | 33       | 0,1      | 2       | 0,1       | 0,1     | 50       | 50       | 1       | 0,1       | 0,1         | 0,1   |
| 39                                        | F      | 55  | Sarcoidosis                     | 56      | 96       | 0        | 0,1      | 10      | 16        | 0,1     | 45       | 55       | 0,8     | 6         | 0,1         | 0,1   |
| 40                                        | F      | 60  | Sarcoidosis suspect             | 32      | 67       | 32       | 0,1      | 2,1     | 2         | 61      | 52       | 48       | 1,1     | 0,1       | 5           | 0,1   |
| 41                                        | F      | 86  | Sarcoidosis suspect             | 64      | 32       | 7        | 39       | 4,5     | 9         | 0,1     | 50       | 50       | 1,0     | 9         | 18          | 0,1   |
| 42                                        | F      | 67  | Sarcoidosis suspect             | 32      | 36       | 16       | 40       | 2       | 24        | 0,1     | 50       | 50       | 1,0     | 12        | 32          | 0,1   |
| 43                                        | F      | 84  | Sarcoidosis suspect             | 8       | 69       | 28       | 0,1      | 2,5     | 37        | 0,1     | 50       | 50       | 1       | 0,1       | 0,1         | 0,1   |
| 44                                        | F      | 53  | Sarcoidosis suspect             | 45      | 38       | 33       | 29       | 1,1     | 28        | 2       | 50       | 50       | 1,0     | 9         | 17          | 0,1   |
| 45                                        | F      | 50  | Sarcoidosis suspect             | 30      | 29       | 29       | 43       | 1       | 22        | 0,1     | 50       | 50       | 1,0     | 22        | 26          | 0,1   |
| 46                                        | F      | 23  | Sarcoidosis suspect             | 34      | 4        | 16       | 69       | 0,3     | 11        | 0,1     | 50       | 50       | 1,0     | 8         | 46          | 0,1   |
| 47                                        | F      | 69  | TB-related uveitis              | 4       | 66       | 29       | 0,1      | 2,3     | 95        | 0,1     | 17       | 83       | 0,2     | 0,1       | 0,1         | 0,1   |
| 48                                        | F      | 54  | TB-related uveitis              | 25      | 25       | 75       | 0,1      | 0,3     | 37        | 37      | 83       | 17       | 5       | 0,1       | 0,1         | 0,1   |
| 49                                        | M      | 39  | TB-related uveitis              | 5       | 100      | 0,1      | 0,1      | 10      | 20        | 0,1     | 50       | 50       | 1       | 75        | 0,1         | 0,1   |
| 50                                        | F      | 72  | TB-related uveitis              | 31      | 55       | 0,1      | 45       | 10      | 8         | 14      | n.a.     | n.a.     | n.a.    | 47        | 0,1         | 0,1   |
| 51                                        | M      | 60  | TB-related uveitis              | 37      | 74       | 21       | 0,1      | 3,5     | 63        | 0,1     | 50       | 50       | 1       | 0,1       | 0,1         | 0,1   |
| 52                                        | M      | 43  | TB-related uveitis              | 31      | 46       | 24       | 27       | 2       | 46        | 1       | 50       | 50       | 0,6     | 3         | 18          | 0,1   |
| 53                                        | M      | 69  | Toxoplasmosis                   | 95      | 50       | 49       | 0,1      | 1       | 3         | 0,1     | 50       | 50       | 1       | 0,1       | 0,1         | 0,1   |
