# Supplementary material for: Combined cellular and soluble mediator analysis for improved diagnosis of vitreoretinal lymphoma
Source: PubMed Central journal article supplement — Acta Ophthalmol. 2019 Jan 27;97(6):626–32. doi: 10.1111/aos.14036 (PMC6796208; doi:10.1111/aos.14036), 2019-01-27
Supplement: AOS-97-626-s002.pdf [file AOS-97-626-s002.pdf]

| Supplementary Table 2 Soluble mediator parameters |        |     |                                 |        |         |       |      |       |            |            |           |         |                   |       |            |        |       |        |         |           |       |        |
|---------------------------------------------------|--------|-----|---------------------------------|--------|---------|-------|------|-------|------------|------------|-----------|---------|-------------------|-------|------------|--------|-------|--------|---------|-----------|-------|--------|
| Patient Info                                      |        |     | Diagnosis                       |        |         |       |      |       |            |            |           |         | Soluble mediators |       |            |        |       |        |         |           |       |        |
|                                                   | Gender | Age | IL-1b                           | IL-1RA | IL-2    | IL-4  | IL-5 | IL-6  | IL-6/IL-10 | IL-10/IL-6 | IL-7      | IL-8    | IL-9              | IL-10 | IL-12(p70) | IL-13  | IL-15 | IL-17A | Eotaxin | FGF basic | G-CSF |        |
|                                                   |        |     | Conc                            | Conc   | Conc    | Conc  | Conc | Conc  | ratio      | ratio      | Conc      | Conc    | Conc              | Conc  | Conc       | Conc   | Conc  | Conc   | Conc    | Conc      | Conc  |        |
| 1                                                 | M      | 74  | Acute retina necrosis           | 0,5    | 52,3    | 5,69  | 3,59 | 1,4   | 2927,78    | 132,17968  | 0,0075655 | 59,04   | 104,18            | 20,84 | 22,15      | 156,23 | 3,13  | 13,46  | 1,8     | 120,51    | 1     | 61,02  |
| 2                                                 | M      | 19  | Acute retina necrosis           | 0,5    | 6,99    | 1,1   | 1,03 | 1,4   | 1090,54    | 149,59396  | 0,0066848 | 447,67  | 30,56             | 1,6   | 7,29       | 18,85  | 7,45  | 5,6    | 1,8     | 27,55     | 20,05 | 2,4    |
| 3                                                 | M      | 40  | Acute retina necrosis           | 0,5    | 73,78   | 11,19 | 3,55 | 1,4   | 2392,24    | 273,39886  | 0,0036577 | 11,82   | 61,38             | 19,81 | 8,75       | 2,3    | 2,07  | 8,29   | 1,8     | 124,79    | 1     | 55,38  |
| 4                                                 | F      | 78  | Colitis ulcerosa                | 0,5    | 6,6     | 1,1   | 0,3  | 1,4   | 171,34     | 77,881818  | 0,01284   | 599,43  | 12,77             | 1,6   | 2,2        | 2,3    | 0,5   | 4,66   | 1,8     | 16,93     | 1     | 40,29  |
| 5                                                 | F      | 61  | E.c.i.                          | 3,14   | 20,56   | 1,1   | 2,1  | 1,4   | 788,56     | 43,185104  | 0,0231561 | 662,27  | 8,76              | 1,6   | 18,26      | 14,08  | 14,93 | 4,27   | 1,8     | 16,47     | 1     | 19,68  |
| 6                                                 | F      | 45  | E.c.i.                          | 0,5    | 5,6     | 1,1   | 0,78 | 1,4   | 142,72     | 64,872727  | 0,0154148 | 494,07  | 7,67              | 1,6   | 2,2        | 4,19   | 8,22  | 1,4    | 1,8     | 1,6       | 1     | 2,4    |
| 7                                                 | F      | 48  | E.c.i. Pars planinitis          | n.a.   | n.a.    | n.a.  | n.a. | n.a.  | n.a.       | n.a.       | n.a.      | n.a.    | n.a.              | n.a.  | n.a.       | n.a.   | n.a.  | n.a.   | n.a.    | n.a.      | n.a.  | n.a.   |
| 8                                                 | M      | 62  | E.c.i. Pars planinitis          | 0,5    | 6,31    | 1,1   | 0,92 | 1,4   | 133,44     | 16,019208  | 0,0624251 | 38,25   | 2,6               | 1,6   | 8,33       | 2,3    | 0,5   | 1,4    | 1,8     | 22,03     | 1     | 2,4    |
| 9                                                 | F      | 74  | E.c.i. Uveitis posterior        | 26,23  | 672,93  | 1,1   | 8,6  | 20,45 | 5416,52    | 16,387378  | 0,0610226 | 265,93  | 6873,57           | 22,33 | 330,53     | 390,81 | 26,2  | 16,7   | 5,76    | 362,06    | 1,24  | 449,16 |
| 10                                                | F      | 56  | E.c.i. Uveitis posterior e.c.i. | 0,5    | 5,6     | 1,1   | 0,3  | 1,4   | 79,74      | 36,245455  | 0,0275897 | 210,13  | 2,6               | 1,6   | 2,2        | 2,3    | 3,68  | 1,4    | 1,8     | 5,15      | 1     | 2,4    |
| 11                                                | F      | 80  | E.c.i. Vitritis                 | 0,5    | 5,6     | 1,1   | 0,3  | 1,4   | 15,91      | 7,2318182  | 0,1382778 | 310,29  | 2,6               | 1,6   | 2,2        | 2,3    | 1,45  | 1,4    | 1,8     | 1,6       | 1     | 2,4    |
| 12                                                | F      | 79  | E.c.i. Vitritis                 | 10,32  | 118,12  | 1,1   | 3,7  | 4,38  | 3673,48    | 53,690149  | 0,0186254 | 262,14  | 270,04            | 5,32  | 68,42      | 2,3    | 14,52 | 4,68   | 1,8     | 44,48     | 1     | 716,86 |
| 13                                                | M      | 63  | E.c.i. Vitritis ODS             | 0,67   | 4,74    | 1,1   | 1,06 | 0,39  | 38,8       | 17,556561  | 0,0569588 | 237,85  | 9,84              | 1,6   | 2,21       | 2,3    | 20,25 | 3,02   | 1,8     | 12,12     | 1     | 2,4    |
| 14                                                | F      | 69  | E.c.i. Vitritis/floaters        | 0,5    | 5,6     | 1,1   | 0,73 | 1,4   | 77,24      | 34,950226  | 0,0286121 | 316,46  | 2,6               | 1,6   | 2,21       | 2,3    | 14,22 | 4,37   | 1,8     | 4,21      | 1     | 2,4    |
| 15                                                | M      | 33  | Endogenous endophthalmitis      | 9,2    | 48,44   | 1,1   | 3,7  | 5,52  | 3264,31    | 621,77333  | 0,0016083 | 287,43  | 73,68             | 6,03  | 5,25       | 3,45   | 69,28 | 2,6    | 1,8     | 22,37     | 1     | 525,44 |
| 16                                                | F      | 71  | no uveitis                      | 0,5    | 5,6     | 1,1   | 0,3  | 1,4   | 130,39     | 59,268182  | 0,0168725 | 500,29  | 4,39              | 1,6   | 2,2        | 2,3    | 1,12  | 2,32   | 1,8     | 3,26      | 1     | 2,4    |
| 17                                                | F      | 68  | no uveitis                      | 1,1    | 6,53    | 1,1   | 1,03 | 1,4   | 236,71     | 26,929465  | 0,037134  | 363,98  | 14,64             | 1,6   | 8,79       | 2,3    | 12,19 | 1,51   | 1,8     | 11,66     | 1     | 2,4    |
| 18                                                | F      | 55  | no uveitis (RRD)                | 0,5    | 5,6     | 1,1   | 0,83 | 1,4   | 124,67     | 56,668182  | 0,0176466 | 1175,66 | 10,16             | 1,6   | 2,2        | 2,3    | 14,82 | 7,17   | 1,8     | 13,96     | 1     | 28,64  |
| 19                                                | M      | 58  | Lymphoma                        | 0,5    | 257,38  | 1,1   | 0,3  | 1,4   | 41,54      | 0,1123614  | 8,8988556 | 15,89   | 2,6               | 1,6   | 369,7      | 2,3    | 0,68  | 19,98  | 3,17    | 3,23      | 11,58 | 6,53   |
| 20                                                | F      | 67  | Lymphoma                        | 2,48   | 82,6    | 1,1   | 0,42 | 1,4   | 42,88      | 0,2374571  | 4,2112873 | 474,85  | 7,26              | 1,6   | 180,58     | 2,3    | 5,07  | 1,86   | 1,8     | 1,6       | 1     | 2,4    |
| 21                                                | M      | 45  | Lymphoma                        | 1,23   | 2005,85 | 1,1   | 1,74 | 1,4   | 299,26     | 0,1014341  | 9,8586179 | 273,32  | 7,8               | 4,21  | 2950,29    | 8,9    | 4,8   | 6,11   | 1,8     | 17,61     | 1     | 9,52   |
| 22                                                | M      | 57  | Lymphoma                        | 1,32   | 31,56   | 1,1   | 0,65 | 7,69  | 11,83      | 0,1401991  | 7,1327134 | 302,37  | 3,68              | 1,6   | 84,38      | 2,3    | 3,68  | 2,07   | 1,8     | 1,81      | 1     | 2,4    |
| 23                                                | F      | 85  | Lymphoma                        | 2,39   | 6851,13 | 1,1   | 3,75 | 4,49  | 4078,09    | 0,2473532  | 4,0428019 | 409,52  | 336,32            | 4,07  | 16486,91   | 181,38 | 12,43 | 1,45   | 1,8     | 21,01     | 1     | 674,04 |
| 24                                                | M      | 71  | Lymphoma                        | 0,62   | 496,66  | 1,1   | 0,63 | 1,4   | 104,7      | 0,124842   | 8,0101242 | 391,12  | 11,23             | 1,6   | 838,66     | 2,3    | 2,82  | 3,04   | 1,8     | 13,5      | 1     | 2,4    |
| 25                                                | F      | 83  | Lymphoma                        | 0,56   | 6,53    | 1,1   | 1,15 | 1,4   | 760,21     | 334,89427  | 0,002986  | 540,62  | 44,23             | 1,6   | 2,27       | 2,3    | 11,94 | 2,47   | 1,8     | 23,05     | 1     | 9,52   |
| 26                                                | M      | 27  | Lymphoma                        | 0,5    | 153,83  | 1,1   | 0,3  | 1,4   | 5,72       | 0,0301481  | 33,16958  | 41,76   | 2,6               | 1,6   | 189,73     | 2,3    | 0,5   | 1,4    | 1,8     | 5,24      | 1     | 2,4    |
| 27                                                | F      | 75  | Lymphoma                        | 1,57   | 1309,58 | 1,1   | 0,63 | 1,4   | 36,19      | 0,0202221  | 49,450953 | 47,43   | 37,33             | 2,11  | 1789,63    | 3,17   | 3,41  | 23,28  | 6,99    | 5,01      | 27,82 | 8,19   |
| 28                                                | M      | 58  | Lymphoma                        | 1,46   | 251,91  | 1,1   | 0,63 | 1,4   | 68,96      | 0,1372857  | 7,2840777 | 420,53  | 2,6               | 1,6   | 502,31     | 2,3    | 2,67  | 2,49   | 1,8     | 3,73      | 1     | 2,4    |
| 29                                                | M      | 45  | MS-related uveitis              | 0,5    | 11,96   | 1,1   | 1,87 | 1,4   | 196,95     | 20,262346  | 0,0493526 | 17,85   | 4,3               | 1,6   | 9,72       | 8,61   | 8,47  | 1,4    | 1,8     | 20,44     | 1     | 12,99  |
| 30                                                | F      | 47  | MS-related uveitis              | 0,5    | 5,6     | 1,1   | 0,3  | 1,4   | 78,04      | 35,472727  | 0,0281907 | 452,67  | 2,6               | 1,6   | 2,2        | 2,3    | 0,5   | 1,4    | 1,8     | 1,6       | 1     | 2,4    |
| 31                                                | M      | 43  | Rubella (FUCHS)                 | 1,7    | 12,29   | 1,1   | 1,18 | 1,52  | 191,55     | 66,74216   | 0,014983  | 273,32  | 7,2               | 1,6   | 2,87       | 2,3    | 11,27 | 1,4    | 1,8     | 11,66     | 1     | 49,06  |
| 32                                                | F      | 78  | Sarcoidosis                     | 7,75   | 68,65   | 1,1   | 3,09 | 4,06  | 1210,35    | 24,412061  | 0,0409634 | 495,86  | 115,64            | 5,6   | 49,58      | 8,53   | 32,63 | 3      | 1,8     | 22,37     | 1     | 128,94 |
| 33                                                | F      | 66  | Sarcoidosis                     | 0,5    | 9,35    | 1,1   | 2,05 | 1,4   | 78,84      | 33,692308  | 0,0296804 | 492,28  | 4,52              | 5,46  | 2,34       | 2,3    | 44,82 | 3,95   | 1,8     | 15,33     | 1     | 22,35  |
| 34                                                | M      | 70  | Sarcoidosis                     | 1,43   | 13,29   | 1,1   | 2,1  | 1,4   | 283,42     | 109,00769  | 0,0091737 | 527,58  | 56,47             | 1,6   | 2,6        | 2,3    | 17,27 | 2,73   | 1,8     | 11,66     | 1     | 2,4    |
| 35                                                | F      | 53  | Sarcoidosis                     | 0,5    | 5,6     | 1,1   | 0,3  | 1,4   | 55,51      | 25,231818  | 0,0396325 | 287,43  | 2,6               | 1,6   | 2,2        | 2,3    | 0,5   | 1,4    | 1,8     | 1,6       | 1     | 2,4    |
| 36                                                | F      | 50  | Sarcoidosis                     | 0,5    | 5,6     | 1,1   | 0,3  | 1,4   | 62,73      | 13,847682  | 0,0722143 | 447,67  | 2,6               | 1,6   | 4,53       | 28,87  | 4,93  | 2,01   | 1,8     | 3,26      | 1     | 2,4    |
| 37                                                | F      | 43  | Sarcoidosis                     | 0,5    | 7,22    | 1,4   | 1,08 | 1,4   | 358,86     | 36,248485  | 0,0275874 | 39,96   | 20,65             | 3,37  | 9,9        | 2,3    | 10,31 | 3,92   | 1,8     | 25,56     | 1     | 11,1   |
| 38                                                | F      | 74  | Sarcoidosis                     | 0,5    | 7,68    | 1,1   | 1,03 | 1,4   | 243,16     | 29,835583  | 0,033517  | 118,2   | 2,6               | 38,07 | 8,15       | 2,3    | 20,42 | 1,4    | 1,8     | 35,03     | 15,45 | 12,25  |
| 39                                                | F      | 55  | Sarcoidosis                     | 0,62   | 14,3    | 1,1   | 1,18 | 1,4   | 272,5      | 9,9963316  | 0,1000367 | 576,17  | 2,6               | 1,6   | 27,26      | 49,63  | 9,98  | 2,03   | 1,8     | 12,58     | 1     | 2,4    |
| 40                                                | F      | 60  | Sarcoidosis suspect             | 0,5    | 5,6     | 1,1   | 0,3  | 1,4   | 123,9      | 56,318182  | 0,0177563 | 487,77  | 2,6               | 1,6   | 2,2        | 2,3    | 6,27  | 1,4    | 1,8     | 6,56      | 1     | 2,4    |
| 41                                                | F      | 86  | Sarcoidosis suspect             | 0,81   | 5,6     | 1,1   | 0,58 | 1,4   | 447,58     | 203,44545  | 0,0049153 | 354,82  | 24,25             | 1,6   | 2,2        | 2,3    | 9,92  | 1,78   | 1,8     | 9,82      | 1     | 30,07  |
| 42                                                | F      | 67  | Sarcoidosis suspect             | 1,26   | 12,29   | 1,1   | 1,57 | 1,4   | 106,74     | 25,115294  | 0,0398164 | 307,15  | 10,8              | 1,6   | 4,25       | 2,3    | 10,84 | 3,46   | 1,8     | 16,24     | 1     | 109,34 |
| 43                                                | F      | 84  | Sarcoidosis suspect             | 1,32   | 5,6     | 1,1   | 1,13 | 1,4   | 1025,11    | 326,46815  | 0,0030631 | 287,43  | 159,14            | 1,6   | 3,14       | 6,61   | 8,03  | 1,8    | 1,8     | 5,62      | 1     | 173,03 |
| 44                                                | F      | 53  | Sarcoidosis suspect             | 0,5    | 5,6     | 1,1   | 0,32 | 1,4   | 654,6      | 297,54545  | 0,0033608 | 360,09  | 3,62              | 1,6   | 2,2        | 2,3    | 2,75  | 1,4    | 1,8     | 1,6       | 1     | 18,74  |
| 45                                                | F      | 50  | Sarcoidosis suspect             | 0,5    | 5,6     | 1,1   | 0,3  | 1,4   | 95,8       | 4,7355413  | 0,2111691 | 430,16  | 2,6               | 1,6   | 20,23      | 2,3    | 4,1   | 2,49   | 1,8     | 1,6       | 1     | 2,4    |
| 46                                                | F      | 23  | Sarcoidosis suspect             | 0,5    | 5,6     | 1,1   | 1,42 | 1,4   | 734,03     | 332,14027  | 0,0030108 | 411,75  | 5,13              | 1,6   | 2,21       | 2,3    | 14,11 | 2,45   | 1,8     | 21,47     | 1     | 34,14  |
| 47                                                | F      | 69  | TB-related uveitis              | 0,5    | 5,6     | 1,1   | 0,32 | 1,4   | 2,3        | 1,0454545  | 0,9565217 | 210,13  | 265,03            | 1,6   | 2,2        | 4,27   | 4,31  | 2,52   | 1,8     | 1,6       | 1     | 2,4    |
| 48                                                | F      | 54  | TB-related uveitis              | 0,5    | 5,6     | 1,1   | 0,3  | 1,4   | 26,72      | 12,145455  | 0,0823353 | 411,75  | 2,6               | 1,6   | 2,2        | 2,3    | 0,5   | 3,36   | 1,8     | 1,6       | 1     | 2,4    |
| 49                                                | M      | 39  | TB-related uveitis              | 0,5    | 5,6     | 1,1   | 0,3  | 1,4   | 114,49     | 52,040909  | 0,0192157 | 413,97  | 8,14              | 1,6   | 2,2        | 2,3    | 0,5   | 2,57   | 1,8     | 1,6       | 1     | 2,4    |
| 50                                                | F      | 72  | TB-related uveitis              | 0,5    | 5,6     | 1,1   | 0,47 | 1,4   | 13,4       | 6,0909091  | 0,1641791 | 322,49  | 2,6               | 1,6   | 2,2        | 2,3    | 5,2   | 1,4    | 1,8     | 1,6       | 1     | 2,4    |
| 51                                                | M      | 60  | TB-related uveitis              | 0,5    | 5,6     | 1,1   | 0,3  | 1,4   | 181,89     | 82,677273  | 0,0120952 | 1042,74 | 2,6               | 1,6   | 2,2        | 2,3    | 6,27  | 2,57   | 1,8     | 3,73      | 1     | 2,4    |
| 52                                                | M      | 43  | TB-related uveitis              | 0,5    | 5,6     | 1,1   | 1,13 | 1,4   | 683,63     | 310,74091  | 0,0032181 | 371,62  | 3,39              | 1,6   | 2,2        | 2,3    | 11,58 | 1,4    | 1,8     | 16,47     | 1     | 6,15   |
| 53                                                | M      | 69  | Toxoplasmosis                   | 0,51   | 8,4     | 1,1   | 1,52 | 4,7   | 49,13      | 22,331818  | 0,0447792 | 280,48  | 2,93              | 1,6   | 2,2        | 2,3    | 16,52 | 1,4    | 1,8     | 13,5      | 1     | 2,4    |

|  |  |  |  |  |  |  |  |  |  |
|--|--|--|--|--|--|--|--|--|--|
|  |  |  |  |  |  |  |  |  |  |
|  |  |  |  |  |  |  |  |  |  |

| GM-CSF | IFN-g  | IP-10    | MCP-1(MCAF) | MIP-1a | PDGF-bb | MIP-1b  | RANTES | TNF-a | VEGF    |
|--------|--------|----------|-------------|--------|---------|---------|--------|-------|---------|
| Conc   | Conc   | Conc     | Conc        | Conc   | Conc    | Conc    | Conc   | Conc  | Conc    |
| 0,8    | 144,68 | 22954,49 | 1086,82     | 0,27   | 17,14   | 40,6    | 5,04   | 10,22 | 9930,65 |
| 0,8    | 28,07  | 41699,42 | 710,49      | 2,5    | 1,5     | 86,06   | 1      | 4,29  | 371,38  |
| 0,8    | 216,29 | 48557,97 | 1339,25     | 0,17   | 21,48   | 26,25   | 6,27   | 18,28 | 15,71   |
| 0,8    | 1,6    | 4230,55  | 399,11      | 1,63   | 1,5     | 26,3    | 1      | 4     | 1,8     |
| 0,8    | 155,37 | 1000000  | 1336,31     | 29,77  | 15,31   | 51,37   | 12,93  | 8,53  | 240,39  |
| 0,8    | 16,13  | 42897,4  | 45,2        | 2,42   | 1,5     | 13,61   | 1      | 4     | 71,49   |
| n.a.   | n.a.   | n.a.     | n.a.        | n.a.   | n.a.    | n.a.    | n.a.   | n.a.  | n.a.    |
| 0,8    | 1,6    | 34319,52 | 543,93      | 0,06   | 1,5     | 6,06    | 1      | 4,37  | 1,8     |
| 0,8    | 851,35 | 1000000  | 1321,86     | 185,39 | 130,79  | 3350,06 | 338,73 | 57,69 | 6175,04 |
| 0,8    | 1,6    | 12022,13 | 164,88      | 1,8    | 1,5     | 17,48   | 4,51   | 4     | 1,8     |
| 0,8    | 1,6    | 12349,75 | 105,41      | 0,99   | 1,5     | 11,72   | 1      | 4     | 1,8     |
| 0,8    | 276,64 | 1000000  | 1327,79     | 63,14  | 44,6    | 156,36  | 192,21 | 19,31 | 8,48    |
| 0,8    | 22,28  | 33385,03 | 356,1       | 7,26   | 1,5     | 141,73  | 96,06  | 4,29  | 1,8     |
| 0,8    | 1,6    | 21969,34 | 208,55      | 3,99   | 1,5     | 30,49   | 32,62  | 4     | 10,28   |
| 0,8    | 420,54 | 1000000  | 1041,05     | 38,41  | 64,53   | 131,79  | 157,88 | 16,85 | 38,89   |
| 0,8    | 1,6    | 2723,51  | 180,07      | 0,06   | 1,5     | 5,68    | 1      | 4     | 1,8     |
| 0,8    | 41,52  | 74642,71 | 725,8       | 16,44  | 1,5     | 36,61   | 199,54 | 5,68  | 1,8     |
| 0,8    | 1,6    | 21747,8  | 1188,32     | 2,62   | 19,39   | 51,63   | 1      | 4     | 106,61  |
| 77,89  | 3,95   | 3849,76  | 1332,01     | 5,78   | 2,08    | 60,88   | 52,08  | 4     | 5,98    |
| 0,8    | 1,6    | 11508,6  | 1154,19     | 29,01  | 1,5     | 73,19   | 16,05  | 4     | 6,63    |
| 0,8    | 103,36 | 1000000  | 871,51      | 15,39  | 35,78   | 195,6   | 37,83  | 8,89  | 306,37  |
| 0,8    | 1,6    | 6113,66  | 1320,72     | 17,19  | 1,5     | 59,55   | 925,41 | 4     | 6,73    |
| 0,8    | 263,11 | 1000000  | 1269,73     | 17,49  | 13,53   | 129,13  | 5,4    | 20,64 | 3641,33 |
| 0,8    | 1,6    | 16477,54 | 1496,31     | 12,77  | 1,5     | 138,37  | 118,44 | 4     | 52,43   |
| 0,8    | 25,21  | 37846,5  | 1092,48     | 4,67   | 9,37    | 50,47   | 1      | 6,03  | 1,8     |
| 0      | 1,6    | 6072,8   | 663,63      | 0,06   | 1,5     | 16,68   | 14,2   | 4     | 1,8     |
| 60,54  | 16,15  | 11847,79 | 706,76      | 17,65  | 3,24    | 243,93  | 62,02  | 12,36 | 24,79   |
| 0,8    | 1,6    | 17677,73 | 752,03      | 20,91  | 1,5     | 58,71   | 78,54  | 4     | 19,87   |
| 0,8    | 3,43   | 25356,67 | 246,88      | 0,06   | 1,5     | 4,56    | 4,86   | 4,48  | 91,6    |
| 0,8    | 1,6    | 3891,47  | 44,81       | 0,06   | 1,5     | 0,7     | 1      | 4     | 1,8     |
| 0,8    | 49,12  | 1000000  | 631,86      | 17,64  | 41,9    | 98,13   | 344,23 | 9,26  | 1,8     |
| 0,8    | 276,64 | 1000000  | 1061,15     | 57,67  | 38,03   | 140,7   | 242,32 | 17,41 | 99,26   |
| 0,8    | 103,36 | 19967,39 | 201,12      | 4,12   | 1,5     | 37,66   | 1      | 5,68  | 22,47   |
| 0,8    | 111,69 | 194660,2 | 963,98      | 15,09  | 1,5     | 41,84   | 1,31   | 8,17  | 2,7     |
| 0,8    | 1,6    | 10001,43 | 71,76       | 0,79   | 1,5     | 7,23    | 1      | 4     | 1,8     |
| 0,8    | 1,6    | 5290     | 139,65      | 0,82   | 1,5     | 20,11   | 1      | 4     | 359,5   |
| 0,8    | 1,6    | 29827,8  | 241,41      | 0,14   | 1,5     | 8,98    | 1      | 4,44  | 1,8     |
| 0,8    | 1,6    | 46479,17 | 426,12      | 0,06   | 1,5     | 8,42    | 1      | 4,59  | 53,26   |
| 0,8    | 68,24  | 1000000  | 354,55      | 9,03   | 1,5     | 37,13   | 1      | 5,33  | 81,22   |
| 0,8    | 1,6    | 1517,28  | 158,18      | 0,06   | 1,5     | 6,7     | 1      | 4     | 1,8     |
| 0,8    | 1,6    | 26701,53 | 246,36      | 11,54  | 1,5     | 20,29   | 3,56   | 4     | 1,8     |
| 0,8    | 99,14  | 1000000  | 617,46      | 12,96  | 26,38   | 68,33   | 46,56  | 8,17  | 1,8     |
| 0,8    | 25,21  | 18135,57 | 1356,19     | 4,79   | 1,5     | 48,29   | 1      | 4,98  | 90,98   |
| 0,8    | 1,6    | 22090,76 | 255,89      | 7,37   | 1,5     | 13,61   | 1      | 4     | 1,8     |
| 0,8    | 1,6    | 2196,78  | 88,61       | 0,06   | 1,5     | 8,77    | 1      | 4     | 16,5    |
| 0,8    | 77,35  | 30947,75 | 36,43       | 2,65   | 1,5     | 9,61    | 1      | 6,39  | 30,78   |
| 0,8    | 1,6    | 1127,71  | 367,97      | 0,34   | 1,5     | 18,56   | 1      | 4     | 74,43   |
| 0,8    | 1,6    | 1968,89  | 46,37       | 0,06   | 1,5     | 4,44    | 1      | 4     | 1,8     |
| 0,8    | 1,6    | 564,44   | 462,59      | 0,06   | 1,5     | 13,87   | 1      | 4     | 7,44    |
| 0,8    | 1,6    | 811,94   | 277,14      | 0,75   | 1,5     | 13,1    | 1      | 4     | 10,82   |
| 0,8    | 1,6    | 5078,88  | 590,58      | 0,06   | 1,5     | 31,53   | 1      | 4     | 1,8     |
| 0,8    | 58,86  | 29714,73 | 28,75       | 2,17   | 1,5     | 3,65    | 1      | 4,29  | 21,76   |
| 0,8    | 151,52 | 1000000  | 545,78      | 5,32   | 7,75    | 24,27   | 588,18 | 7,46  | 1,8     |
