# Supplementary material for: Combined cellular and soluble mediator analysis for improved diagnosis of vitreoretinal lymphoma
Source: PubMed Central journal article supplement — Acta Ophthalmol. 2019 Jan 27;97(6):626–32. doi: 10.1111/aos.14036 (PMC6796208; doi:10.1111/aos.14036), 2019-01-27
Supplement: AOS-97-626-s003.pdf [file AOS-97-626-s003.pdf]

**Supplementary Table 3 Survival data lymphom**

|    | Patient Info |     | Diagnosis |
|----|--------------|-----|-----------|
|    | Gender       | Age |           |
| 19 | M            | 58  | Lymphoma  |
| 20 | F            | 67  | Lymphoma  |
| 21 | M            | 45  | Lymphoma  |
| 22 | M            | 57  | Lymphoma  |
| 23 | F            | 85  | Lymphoma  |
| 24 | M            | 71  | Lymphoma  |
| 25 | F            | 83  | Lymphoma  |
| 26 | M            | 27  | Lymphoma  |
| 27 | F            | 75  | Lymphoma  |
| 28 | M            | 58  | Lymphoma  |
|    |              |     |           |
|    |              |     |           |
|    |              |     |           |
|    |              |     |           |

| <b>1a cases</b>                                     |                           |
|-----------------------------------------------------|---------------------------|
| <b>Treatment</b>                                    | <b>Follow-up (months)</b> |
| intraocular and systemic chemotherapy, radiotherapy | 38                        |
| systemic chemotherapy                               | 87                        |
| intraocular and systemic chemotherapy, radiotherapy | 34                        |
| systemic chemotherapy, radiotherapy                 | 66                        |
| intraocular chemotherapy                            | 61                        |
| intraocular chemotherapy, radiotherapy              | 107                       |
| intraocular chemotherapy                            | 47                        |
| intraocular and systemic chemotherapy               | 43                        |
| intraocular and systemic chemotherapy, radiotherapy | 32                        |
| intraocular and systemic chemotherapy, radiotherapy | 102                       |
|                                                     |                           |
|                                                     |                           |
|                                                     |                           |
|                                                     |                           |

|                |  |  |  |  |  |  |  |  |
|----------------|--|--|--|--|--|--|--|--|
|                |  |  |  |  |  |  |  |  |
|                |  |  |  |  |  |  |  |  |
| <b>Outcome</b> |  |  |  |  |  |  |  |  |
|                |  |  |  |  |  |  |  |  |
|                |  |  |  |  |  |  |  |  |
| alive          |  |  |  |  |  |  |  |  |
| died           |  |  |  |  |  |  |  |  |
| died           |  |  |  |  |  |  |  |  |
| died           |  |  |  |  |  |  |  |  |
| died           |  |  |  |  |  |  |  |  |
| died           |  |  |  |  |  |  |  |  |
| alive          |  |  |  |  |  |  |  |  |
| alive          |  |  |  |  |  |  |  |  |
| died           |  |  |  |  |  |  |  |  |
| died           |  |  |  |  |  |  |  |  |
|                |  |  |  |  |  |  |  |  |
|                |  |  |  |  |  |  |  |  |
|                |  |  |  |  |  |  |  |  |
|                |  |  |  |  |  |  |  |  |







|  |  |  |  |  |  |  |  |  |
|--|--|--|--|--|--|--|--|--|
|  |  |  |  |  |  |  |  |  |
|  |  |  |  |  |  |  |  |  |
|  |  |  |  |  |  |  |  |  |
|  |  |  |  |  |  |  |  |  |
|  |  |  |  |  |  |  |  |  |

|  |  |  |  |  |  |  |  |  |
|--|--|--|--|--|--|--|--|--|
|  |  |  |  |  |  |  |  |  |
|  |  |  |  |  |  |  |  |  |
|  |  |  |  |  |  |  |  |  |
|  |  |  |  |  |  |  |  |  |

|  |  |  |  |  |  |  |  |  |
|--|--|--|--|--|--|--|--|--|
|  |  |  |  |  |  |  |  |  |
|  |  |  |  |  |  |  |  |  |
|  |  |  |  |  |  |  |  |  |
|  |  |  |  |  |  |  |  |  |
|  |  |  |  |  |  |  |  |  |

|  |  |  |  |  |  |  |  |  |
|--|--|--|--|--|--|--|--|--|
|  |  |  |  |  |  |  |  |  |
|  |  |  |  |  |  |  |  |  |
|  |  |  |  |  |  |  |  |  |
|  |  |  |  |  |  |  |  |  |



|  |  |  |  |  |  |
|--|--|--|--|--|--|
|  |  |  |  |  |  |
|  |  |  |  |  |  |
|  |  |  |  |  |  |
|  |  |  |  |  |  |
|  |  |  |  |  |  |

|  |  |  |  |  |  |
|--|--|--|--|--|--|
|  |  |  |  |  |  |
|  |  |  |  |  |  |
|  |  |  |  |  |  |
|  |  |  |  |  |  |
